# Supplementary material
Source: PubMed Central journal article supplement (PMC4421874)
Supplement: NIHMS63114-supplement-01.pdf [file NIHMS63114-supplement-01.pdf]

## Supplementary Materials:

A

| LHerhaus 120510 H 14      GFP-OTUB1 sample              |           |              |                |                 |
|---------------------------------------------------------|-----------|--------------|----------------|-----------------|
| m/z                                                     | Mass      | Mascot Score | Retention Time | MS2 Scan Number |
| 992.7518                                                | 2975.2314 | 87           | 22.06          | 1840            |
| K.QEPLGSDSEGVNCLAYDEAIMAQQDR.I + P (ST)                 |           |              |                |                 |
| LHerhaus 120510 H 23      GFP-OTUB1 plus TGFbeta sample |           |              |                |                 |
| m/z                                                     | Mass      | Mascot Score | Retention Time | MS2 Scan Number |
| 992.7512                                                | 2975.2314 | 71           | 22.16          | 1863            |
| K.QEPLGSDSEGVNCLAYDEAIMAQQDR.I + P (ST)                 |           |              |                |                 |
| 1488.6161                                               | 2975.2314 | 35           | 22.18          | 1867            |
| K.QEPLGSDSEGVNCLAYDEAIMAQQDR.I + P (ST)                 |           |              |                |                 |
| 998.0828                                                | 2991.2263 | 56           | 20.70          | 1657            |
| K.QEPLGSDSEGVNCLAYDEAIMAQQDR.I + Ox (M); P (ST)         |           |              |                |                 |

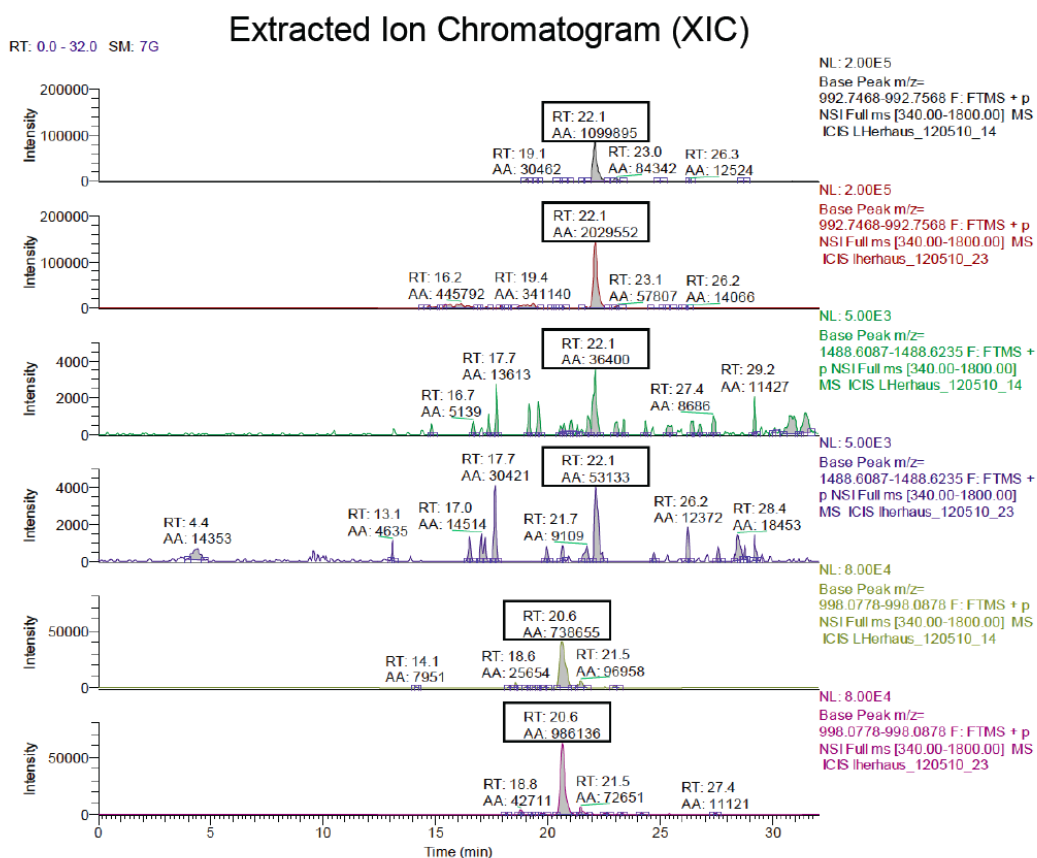

**Figure S1: ALK5 binds OTUB1 but does not induce Ser<sup>16</sup> phosphorylation in cells. (A)** Identification of the OTUB1 phospho-peptide by mass spectrometry. GFP-OTUB1 expressed in HEK293 cells treated with or without TGFβ (50 pM, 1 hour) was affinity-purified, resolved by SDS-PAGE, subjected to tryptic cleavage and the resulting peptides assessed by mass spectrometry and extracted ion chromatogram (XIC) analysis for detection of post-translational modifications. The Mascot and XIC analyses are indicated. Detailed protocol, analyses and the raw mass spectrometric data are included in the PRIDE database as noted in the main manuscript. (*Cont'd next page*).

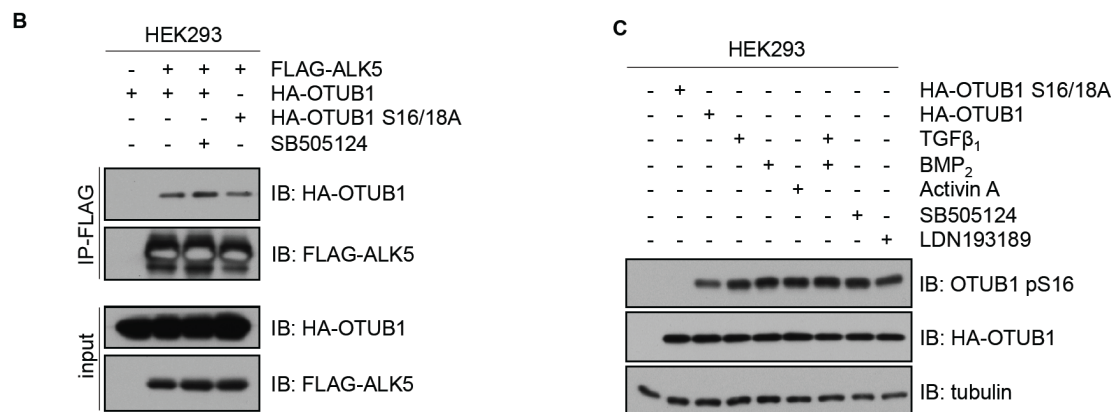

**Figure S1 (cont'd): (B)** HEK293 cells were co-transfected with vectors encoding N-terminal HA-tagged OTUB1 or HA-OTUB1[S16A and S18A (S16/18A)] and N-terminal FLAG-tagged ALK5. Prior to lysis cells were treated with or without SB505124 (1  $\mu$ M, 1 hour). FLAG-immunoprecipitates or extracts were resolved by SDS-PAGE and immunoblotted with the indicated antibodies. **(C)** HEK293 cells were transfected with vectors encoding N-terminal HA-tagged OTUB1 or HA-OTUB1[S16/18A]. Prior to lysis cells were treated with indicated cytokines or inhibitors [TGFβ<sub>1</sub> (50 pM, 1 hour), BMP<sub>2</sub> (25 ng/ml, 1 hour), Activin A (20 ng/ml, 1 hour), SB505124 (1  $\mu$ M, 1 hour), LDN193189 (100 nM, 1 hour), TDB (10  $\mu$ M, 4 hours)]. Extracts were resolved by SDS-PAGE and immunoblotted with the indicated antibodies. Data are representative of three independent experiments.

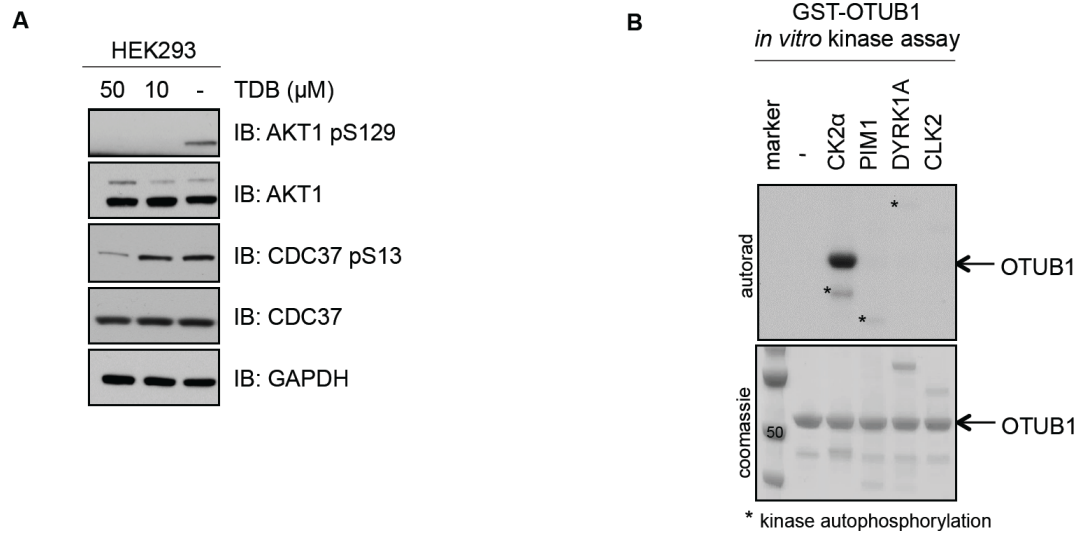

**Figure S2: CK2 substrates and pSer<sup>16</sup>-OTUB1 phosphorylation. (A)** HEK293 cells were treated with indicated amounts of TDB for 4 hours. Extracts were resolved by SDS-PAGE and immunoblotted with the indicated antibodies. **(B)** An *in vitro* kinase assay was set up with different kinases (that are inhibited with TDB) using GST-OTUB1 as substrate in the presence of <sup>32</sup>P-ATP (500 cpm/pmole). The reaction was stopped after 30 min at 30°C and the samples were resolved by SDS-PAGE, the gel was Coomassie stained and radioactivity was analyzed by autoradiography. Data are representative of of three independent experiments.

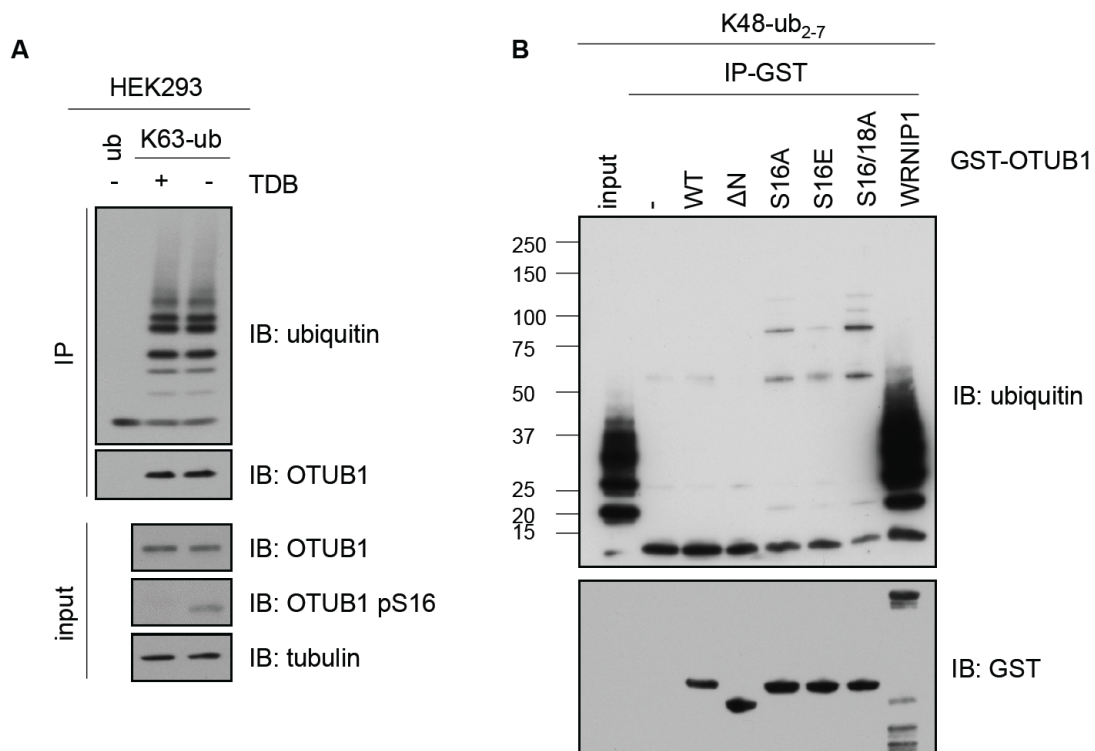

**Figure S3: Interaction between OTUB1 and polyubiquitin chains. (A)** K63-linked polyubiquitin chains pull-down endogenous OTUB1. HEK293 cells were treated with DMSO control or TDB (4 hours, 10  $\mu$ M) and lysed. Agarose beads that were coupled to monoubiquitin (first lane, negative control) or K63-linked polyubiquitin chains were incubated with indicated extracts. The beads were washed and resolved by SDS-PAGE and processed for immunoblotting with the indicated antibodies. Extracts (20  $\mu$ g protein) were also resolved by SDS-PAGE and subjected to immunoblotting with the indicated antibodies. **(B)** GST-OTUB1 wild type or indicated mutants and GST-WRNIP1 were incubated with K48-linked polyubiquitin chains for 1 hour at 30°C and GST-tagged proteins pulled-down with GSH-sepharose beads. The pulldowns were washed and resolved by SDS-PAGE and immunoblotted with the indicated antibodies. Data are representative of three independent experiments.

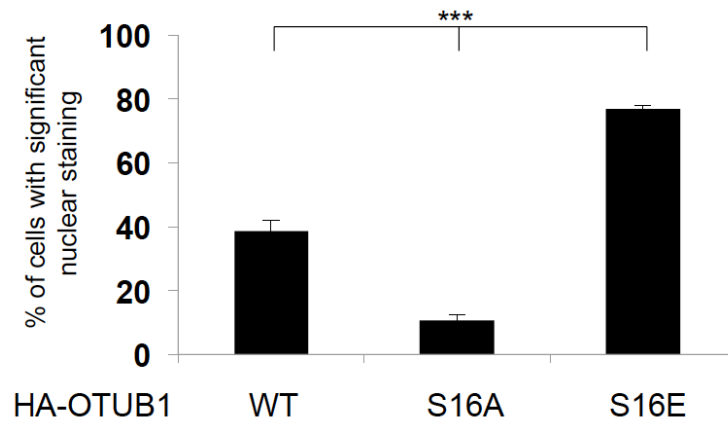

**Figure S4: Quantification of Fig. 5B.** The number of HA-OTUB1 [WT, S16A, S16E] cells (Figure 5B) with substantial anti-HA staining in the nucleus. Data mean  $\pm$  S.D. from 3 experiments, 100 cells each. \*\*\* $p < 0.001$ .

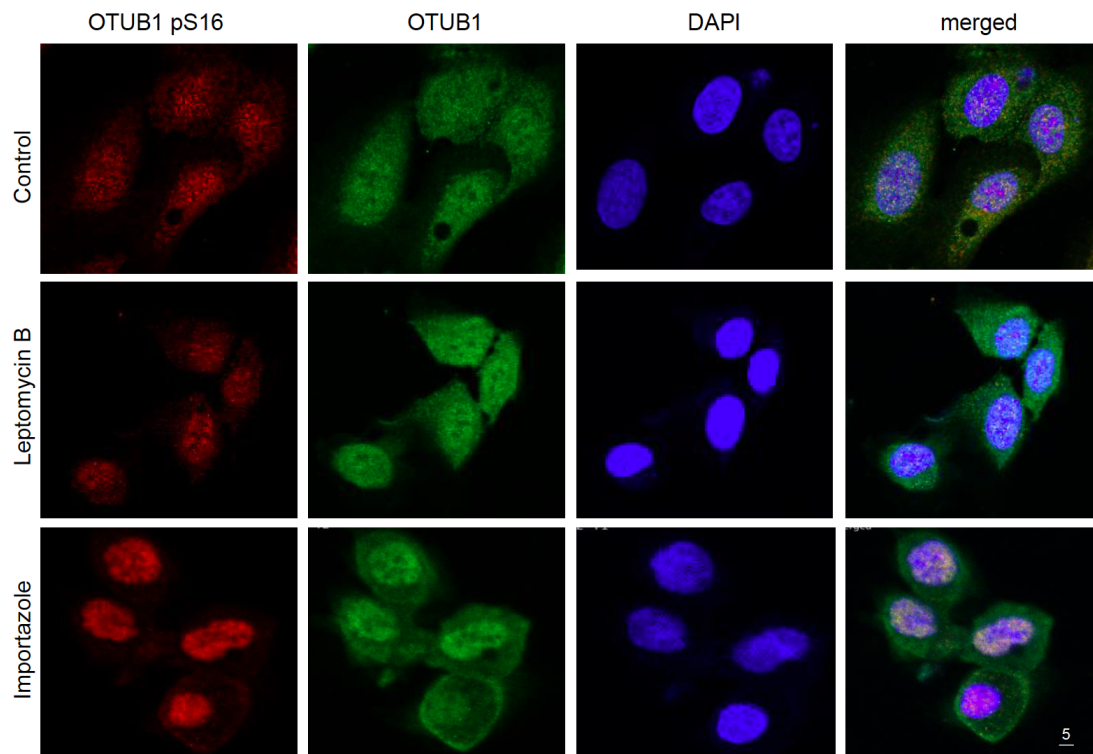

**Figure S5: Effects of leptomycin B and importazole on OTUB1 localization.** Fixed cell immunofluorescence with the indicated antibodies was performed on U2OS cells treated or not with leptomycin B (10  $\mu$ M, 4 hours) or importazole (40  $\mu$ M, 4 hours). Individual and merged pictures show pSer16-OTUB1 in red, total OTUB1 in green and DAPI in blue. Scale bar, 5  $\mu$ m. Data are representative of three independent experiments.
